# Supplementary material
Source: publisher figshare collection journal article supplement (https://karger.figshare.com/ndownloader/files/37424698)
Supplement: Supplementary file 1 [file 37424698]

Supplemental figure: Pathological findings of unstable carotid plaque. A) Histological findings with Masson trichrome stain. Intraplaque hemorrhage and fibrous cap disruption are apparent. B) Finding of INVs with CD-34 stain. Small INVs are identified around the site of fibrous cap disruption, and some have contact with the vascular lumen through the site of fibrous cap disruption.
